# Supplementary material for: Exploring the prominent performance of CX-4945 derivatives as protein kinase CK2 inhibitors by a combined computational study
Source: Royal Society of Chemistry journal article supplement (doi:10.1039/c4mb00013g), 2014-02-07
Supplement: c4mb00013g1.pdf [file c4mb00013g1.pdf]

## Supporting Materials

**Table S1** The structures and biological activities of the 48 inhibitors of CK2

| 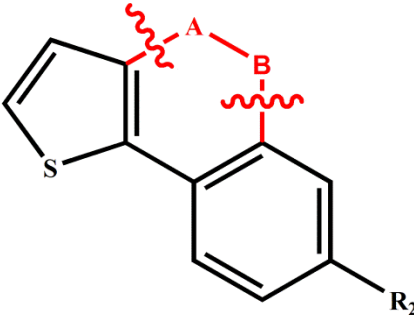   |                                                                                   |                                       |                       |                   |
|--------------------------------------------------------------------------------------|-----------------------------------------------------------------------------------|---------------------------------------|-----------------------|-------------------|
| No.                                                                                  |  | R <sub>2</sub>                        | IC <sub>50</sub> (μM) | pIC <sub>50</sub> |
| 1                                                                                    | -CO-NH-                                                                           | CO <sub>2</sub> H                     | 2.1                   | 5.678             |
| 2                                                                                    | -CO-N((CH <sub>2</sub> ) <sub>3</sub> OH)-                                        | CO <sub>2</sub> H                     | 1.5                   | 5.824             |
| 3                                                                                    | -(C-O(CH <sub>2</sub> ) <sub>3</sub> OH)=N-                                       | CO <sub>2</sub> H                     | 0.99                  | 6.004             |
| 4                                                                                    | -(C-NH(CH <sub>2</sub> ) <sub>3</sub> OH)=N-                                      | CO <sub>2</sub> H                     | 0.75                  | 6.125             |
|  |                                                                                   |                                       |                       |                   |
| NO.                                                                                  | -NR <sub>3</sub> R <sub>4</sub>                                                   | R <sub>2</sub>                        | IC <sub>50</sub> (μM) | pIC <sub>50</sub> |
| 5                                                                                    | -NH-(CH <sub>2</sub> ) <sub>2</sub> OH                                            | CO <sub>2</sub> H                     | 1.26                  | 5.900             |
| 6                                                                                    | -NH-(CH <sub>2</sub> ) <sub>2</sub> NMe <sub>2</sub>                              | CO <sub>2</sub> H                     | 0.102                 | 6.991             |
| 7                                                                                    | -Pyrrolidino                                                                      | CO <sub>2</sub> H                     | 1.78                  | 5.750             |
| 8                                                                                    | -NH-phenyl                                                                        | CO <sub>2</sub> H                     | 0.092                 | 7.036             |
| 9                                                                                    | -NMe-phenyl                                                                       | CO <sub>2</sub> H                     | 1.07                  | 5.971             |
| 10                                                                                   | -NH-(2-Me-phenyl)                                                                 | CO <sub>2</sub> H                     | 0.97                  | 6.013             |
| 11                                                                                   | -NH-phenyl                                                                        | <i>C</i> -(1 <i>H</i> -tetrazol-5-yl) | 0.096                 | 7.018             |
| 12                                                                                   | -NH-(CH <sub>2</sub> ) <sub>2</sub> Ph                                            | CO <sub>2</sub> H                     | 0.516                 | 6.287             |
| 13                                                                                   | -NH-(4-F-phenyl)                                                                  | CO <sub>2</sub> H                     | 0.219                 | 6.660             |

|    |                           |                                       |       |       |
|----|---------------------------|---------------------------------------|-------|-------|
| 14 | -NH-(3-F-phenyl)          | CO <sub>2</sub> H                     | 0.068 | 7.167 |
| 15 | -NH-(4-Cl-phenyl)         | CO <sub>2</sub> H                     | 0.178 | 6.750 |
| 16 | -NH-(3-Cl-phenyl)         | CO <sub>2</sub> H                     | 0.032 | 7.495 |
| 17 | -NH-(3-MeO-phenyl)        | CO <sub>2</sub> H                     | 0.077 | 7.114 |
| 18 | -NH-(3-acetylenyl-phenyl) | CO <sub>2</sub> H                     | 0.028 | 7.553 |
| 19 | -NH-(3-(PhO)-phenyl)      | CO <sub>2</sub> H                     | 0.395 | 6.403 |
| 20 | -NH-(3-(CONHMe)-phenyl)   | CO <sub>2</sub> H                     | 0.129 | 6.889 |
| 21 | -NH-(3-Cl-phenyl)         | <i>C</i> -(1 <i>H</i> -tetrazol-5-yl) | 0.129 | 6.889 |
| 22 | -NH-(3-F-phenyl)          | <i>C</i> -(1 <i>H</i> -tetrazol-5-yl) | 0.075 | 7.125 |

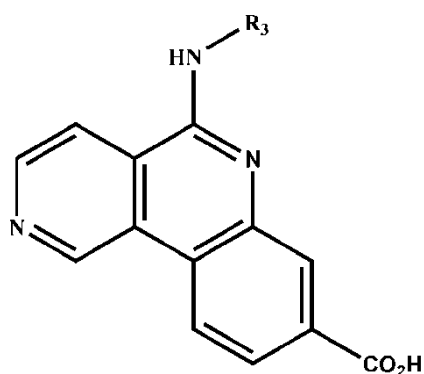

| NO. | R <sub>3</sub>                                    | IC <sub>50</sub> (μM) | pIC <sub>50</sub> |
|-----|---------------------------------------------------|-----------------------|-------------------|
| 23  | -phenyl                                           | 0.006                 | 8.222             |
| 24  | -(CH <sub>2</sub> ) <sub>2</sub> NMe <sub>2</sub> | 0.025                 | 7.602             |
| 25  | -cyclopentyl                                      | 0.027                 | 7.569             |
| 26  | -OMe                                              | 0.008                 | 8.097             |
| 27  | -cyclopropyl                                      | 0.016                 | 7.796             |
| 28  | -(CH <sub>2</sub> ) <sub>2</sub> O- <i>i</i> -Pr  | 0.011                 | 7.959             |
| 29  | -(CH <sub>2</sub> )phenyl                         | 0.009                 | 8.046             |
| 30  | -(CH <sub>2</sub> ) <sub>2</sub> phenyl           | 0.003                 | 8.523             |
| 31  | -(CH <sub>2</sub> ) <sub>3</sub> phenyl           | 0.016                 | 7.796             |
| 32  | -(3-MeO-phenyl)                                   | 0.004                 | 8.398             |
| 33  | -(3-Cl, 4-F-phenyl)                               | 0.004                 | 8.398             |
| 34  | -(3-F-phenyl)                                     | 0.005                 | 8.301             |
| 35  | -(2-Cl-phenyl)                                    | 0.008                 | 8.097             |
| 36  | -(3-Cl-phenyl)                                    | 0.001                 | 9.000             |
| 37  | -(4-Cl-phenyl)                                    | 0.007                 | 8.155             |
| 38  | -(3-acetylenyl-phenyl)                            | 0.003                 | 8.523             |
| 39  | -(3-CN-phenyl)                                    | 0.004                 | 8.398             |
| 40  | -(4-(PhO)-phenyl)                                 | 0.069                 | 7.161             |
| 41  | -(3-(PhO)-phenyl)                                 | 0.019                 | 7.721             |
| 42  | -(3-(SO <sub>2</sub> NH <sub>2</sub> )-phenyl)    | 0.043                 | 7.367             |

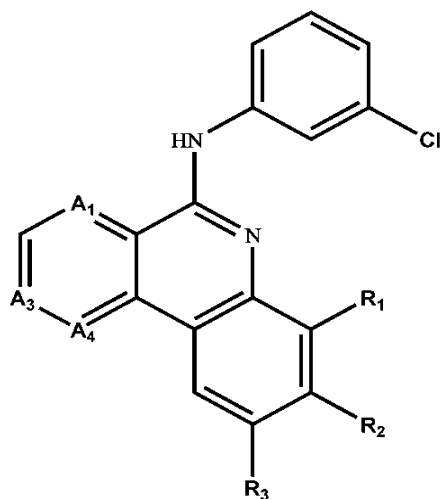

| NO. | A <sub>1</sub> | A <sub>3</sub> | A <sub>4</sub> | R <sub>1</sub> | R <sub>2</sub>                        | R <sub>3</sub>    | IC <sub>50</sub> (μM) | pIC <sub>50</sub> |
|-----|----------------|----------------|----------------|----------------|---------------------------------------|-------------------|-----------------------|-------------------|
| 43  | CH             | N              | CH             | H              | <i>C</i> -(1 <i>H</i> -tetrazol-5-yl) | H                 | 0.045                 | 7.347             |
| 44  | CH             | N              | CH             | H              | CONH <sub>2</sub>                     | H                 | 0.417                 | 6.380             |
| 45  | CH             | N              | CH             | Me             | CO <sub>2</sub> H                     | H                 | 0.006                 | 8.222             |
| 46  | CH             | N              | CH             | H              | H                                     | CO <sub>2</sub> H | 0.35                  | 6.456             |
| 47  | N              | CH             | N              | H              | CO <sub>2</sub> H                     | H                 | 0.22                  | 6.658             |
| 48  | N              | N              | CH             | H              | CO <sub>2</sub> H                     | H                 | 0.007                 | 8.155             |

**Table S2.** Docking scores of 48 inhibitors predicted by different docking protocols

| No. | pIC50 | HTVS score | SP score | XP score | IFD score |
|-----|-------|------------|----------|----------|-----------|
| 1   | 5.678 | -8.654     | -8.799   | -7.960   | -7.901    |
| 2   | 5.824 | -8.020     | -9.050   | -8.862   | -8.954    |
| 3   | 6.004 | -8.943     | -9.173   | -9.382   | -9.437    |
| 4   | 6.125 | -8.611     | -8.726   | -8.715   | -9.088    |
| 5   | 5.900 | -8.137     | -8.554   | -8.689   | -8.951    |
| 6   | 6.991 | -8.201     | -8.360   | -7.810   | -8.502    |
| 7   | 5.750 | -8.804     | -9.024   | -8.026   | -8.633    |
| 8   | 7.036 | -8.861     | -9.001   | -8.607   | -6.162    |
| 9   | 5.971 | -8.522     | -8.429   | -5.787   | -8.790    |
| 10  | 6.013 | -8.850     | -9.035   | -2.823   | -7.120    |
| 11  | 7.018 | -7.926     | -8.022   | -6.788   | -5.299    |
| 12  | 6.287 | -8.181     | -8.720   | -8.167   | -9.104    |
| 13  | 6.660 | -8.912     | -9.045   | -8.932   | -9.192    |
| 14  | 7.167 | -9.046     | -9.414   | -8.996   | -8.842    |
| 15  | 6.750 | -8.849     | -9.005   | -8.908   | -9.376    |
| 16  | 7.495 | -8.958     | -9.401   | -9.271   | -9.603    |
| 17  | 7.114 | -8.958     | -9.321   | -9.190   | -7.815    |
| 18  | 7.553 | -9.064     | -9.265   | -9.280   | -8.934    |
| 19  | 6.403 | -6.803     | -8.429   | -9.633   | -10.369   |
| 20  | 6.889 | -8.767     | -9.304   | -4.878   | -9.537    |
| 21  | 6.889 | -8.229     | -8.302   | -7.819   | -8.139    |
| 22  | 7.125 | -7.886     | -8.089   | -7.791   | -7.003    |
| 23  | 8.222 | -10.493    | -10.620  | -11.224  | -12.120   |
| 24  | 7.602 | -10.318    | -10.481  | -11.468  | -11.299   |
| 25  | 7.569 | -10.535    | -10.664  | -11.792  | -12.360   |
| 26  | 8.097 | -10.391    | -10.528  | -11.231  | -10.857   |
| 27  | 7.796 | -10.332    | -10.518  | -11.266  | -11.360   |
| 28  | 7.959 | -9.714     | -10.475  | -11.767  | -11.571   |
| 29  | 8.046 | -10.068    | -10.468  | -11.158  | -12.179   |
| 30  | 8.523 | -10.448    | -10.550  | -12.387  | -12.969   |
| 31  | 7.796 | -10.635    | -10.836  | -12.258  | -11.621   |
| 32  | 8.398 | -10.823    | -10.949  | -10.472  | -12.555   |
| 33  | 8.398 | -10.745    | -11.030  | -12.108  | -12.508   |
| 34  | 8.301 | -10.899    | -11.081  | -11.247  | -12.101   |
| 35  | 8.097 | -10.462    | -10.703  | -10.347  | -11.791   |
| 36  | 9.000 | -10.826    | -10.986  | -11.480  | -12.492   |
| 37  | 8.155 | -10.409    | -10.580  | -11.720  | -12.231   |
| 38  | 8.523 | -10.701    | -10.846  | -12.071  | -12.526   |
| 39  | 8.398 | -11.047    | -11.157  | -11.826  | -12.150   |
| 40  | 7.161 | -9.885     | -10.313  | -11.474  | -12.062   |
| 41  | 7.721 | -10.850    | -11.126  | -12.485  | -13.267   |
| 42  | 7.367 | -11.055    | -11.396  | -12.572  | -13.287   |

|    |       |         |         |         |         |
|----|-------|---------|---------|---------|---------|
| 43 | 7.347 | -8.569  | -9.574  | -8.439  | -11.799 |
| 44 | 6.380 | -7.883  | -10.149 | -10.624 | -10.824 |
| 45 | 8.222 | -11.009 | -11.092 | -12.178 | -12.912 |
| 46 | 6.456 | -7.783  | -7.956  | -9.194  | -9.343  |
| 47 | 6.658 | -8.711  | -8.931  | -9.350  | -9.416  |
| 48 | 8.155 | -10.700 | -11.032 | -12.044 | -12.332 |

---

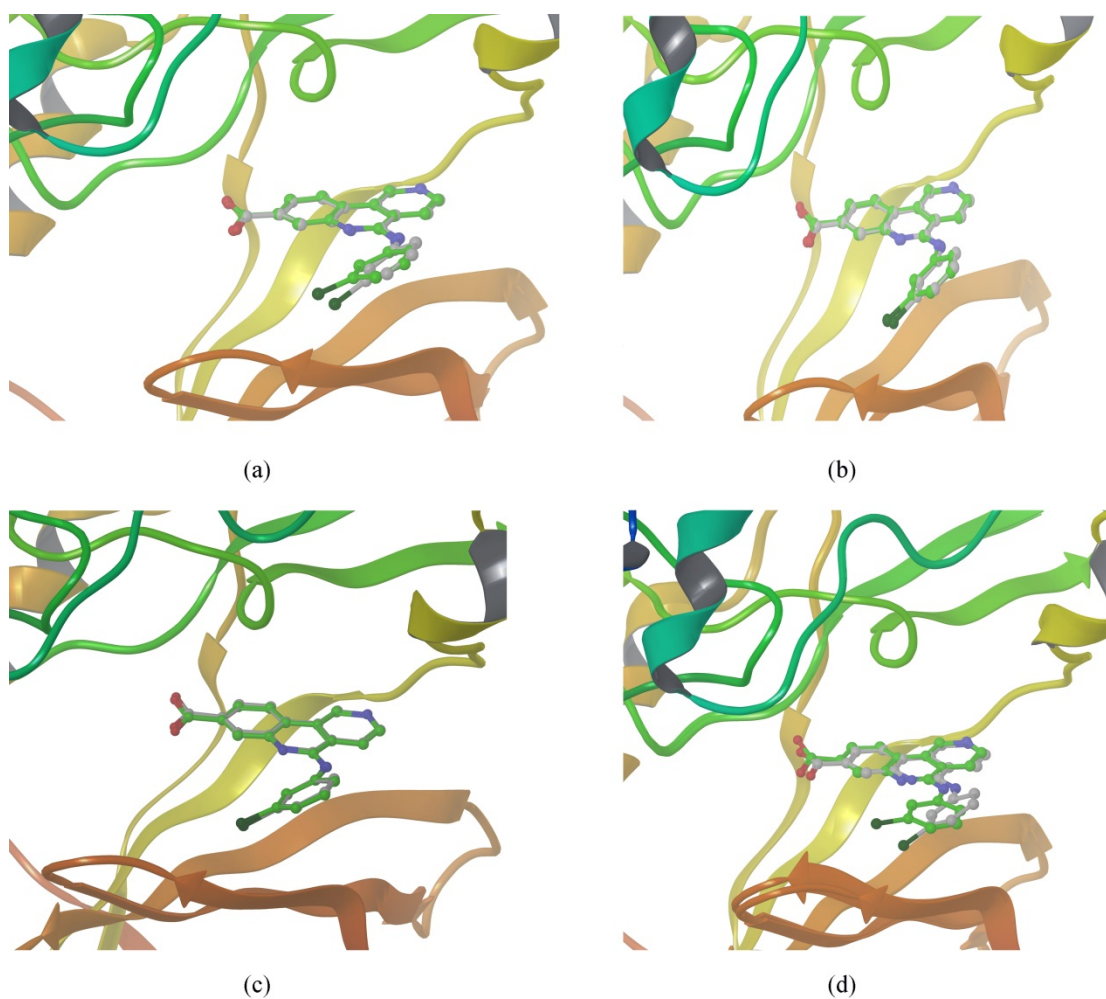

**Figure S1.** The superposition of the docked structures of CX-4945 predicted with (a) *Glide* HTVS docking, (b) *Glide* SP docking, (c) *Glide* XP docking and (d) induced fit docking with its original structure in the crystallographic complex. (carbon atoms in the crystal structure are colored in gray, and those in the redocked structures in green)

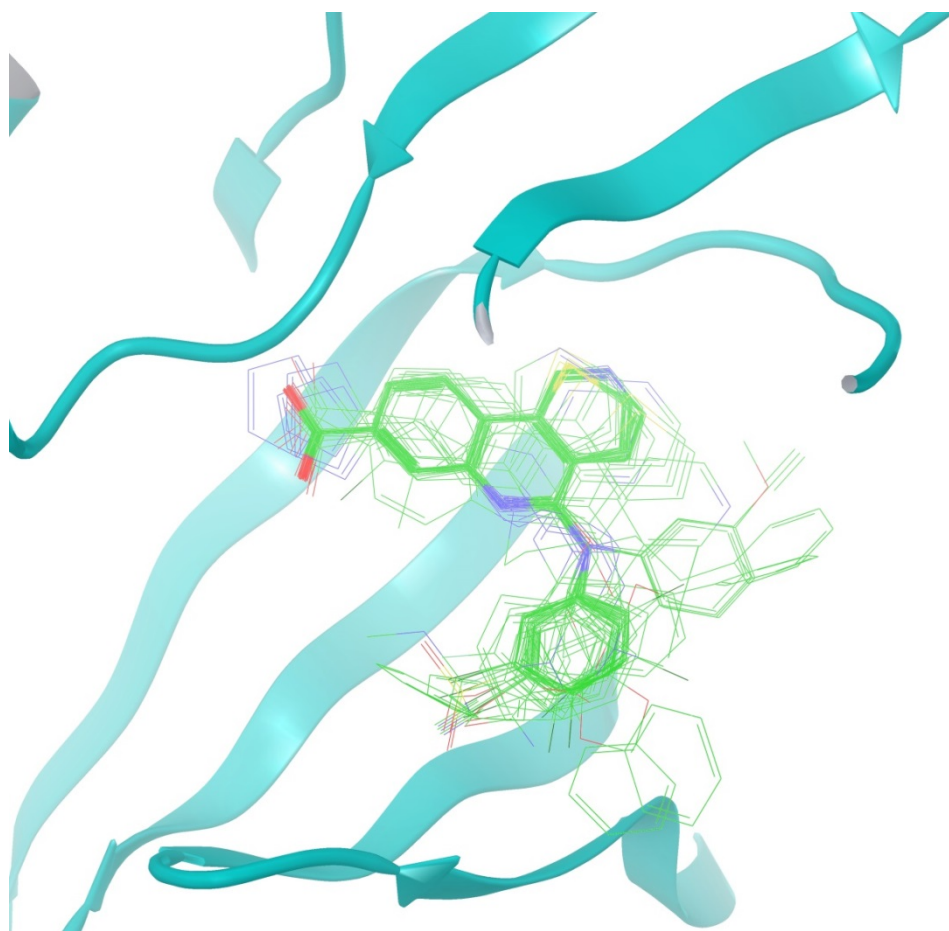

**Figure S2.** The superposition of the docked structures of the 48 inhibitors (carbon atoms are colored in green)

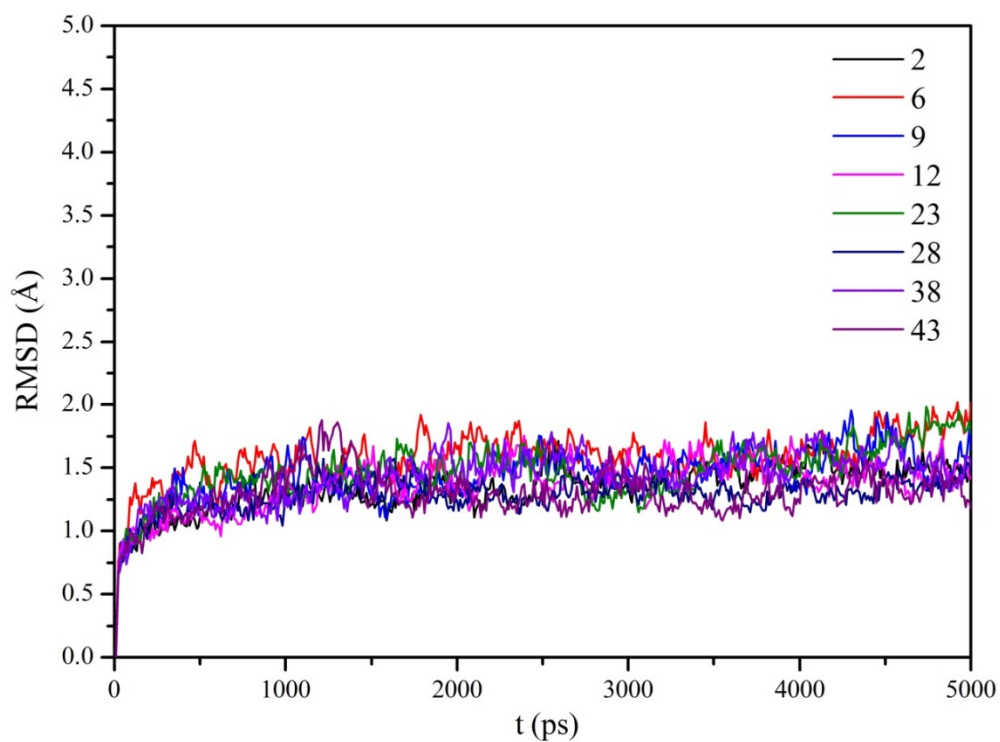

**Figure S3.** Root-mean-square displacement (RMSD) of the backbone C $\alpha$  atoms of the CK2/inhibitor complexes (2, 6, 9, 12, 23, 28, 38 and 43) with respect to the first snapshot as a function of time.
